# Supplementary material
Source: Elsevier journal article supplement (https://comptes-rendus.academie-sciences.fr/biologies/article/10.1016/j.crvi.2010.12.001/file/attach/mmc3.pdf)

Appendix III. CAH of the 3 first axes of CA. The vertical truncature line is dotted.

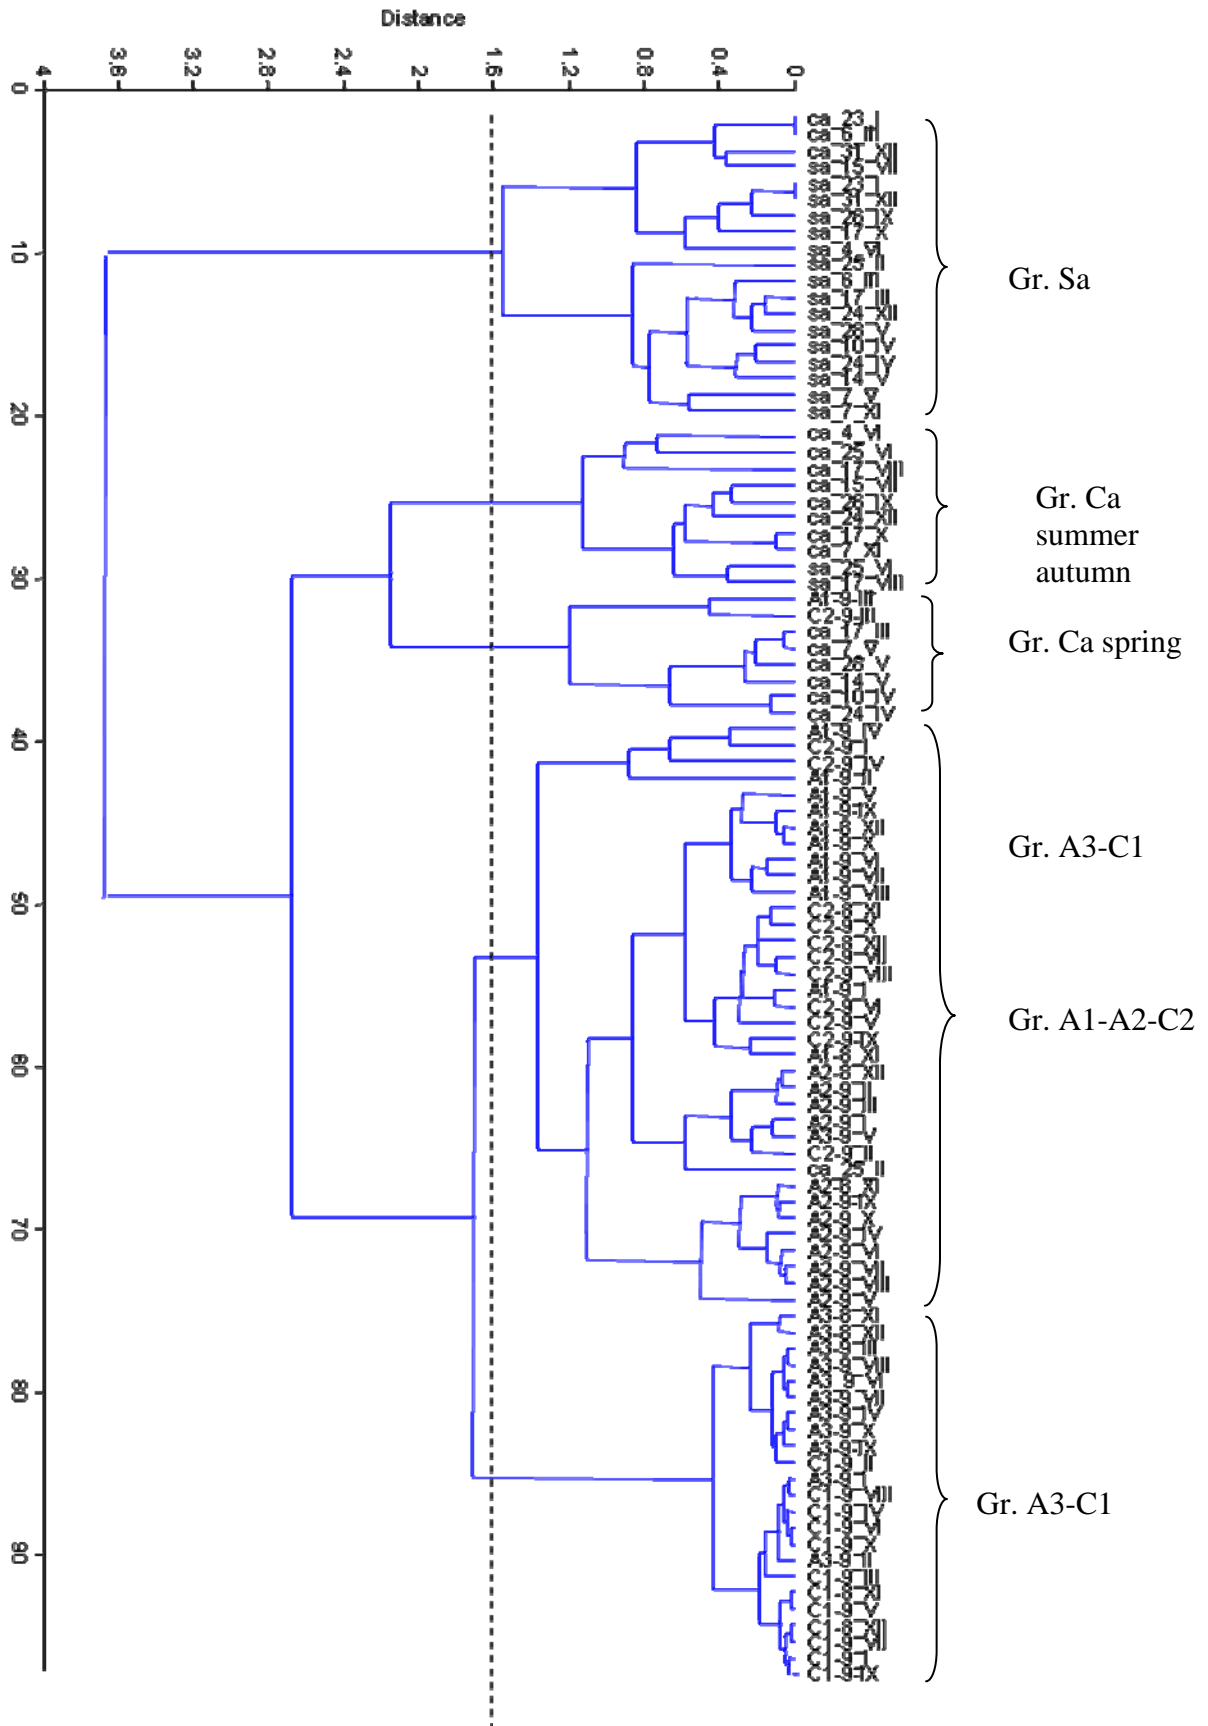

Supplement: mmc3 [file mmc3.pdf]
